# Supplementary material for: Low-density lipoprotein receptor genotypes modify the sera metabolome of patients with homozygous familial hypercholesterolemia
Source: PubMed Central journal article supplement — iScience. 2022 Oct 12;25(11):105334. doi: 10.1016/j.isci.2022.105334 (PMC9618791; doi:10.1016/j.isci.2022.105334), 2022-10-12
Supplement: mmc1.pdf [file mmc1.pdf]

iScience, Volume 25

## **Supplemental information**

### **Low-density lipoprotein receptor genotypes modify the sera metabolome of patients with homozygous familial hypercholesterolemia**

**Zhiyong Du, Fan Li, Linyi Li, Yu Wang, Jianping Li, Ya Yang, Long Jiang, Luya Wang, and Yanwen Qin**

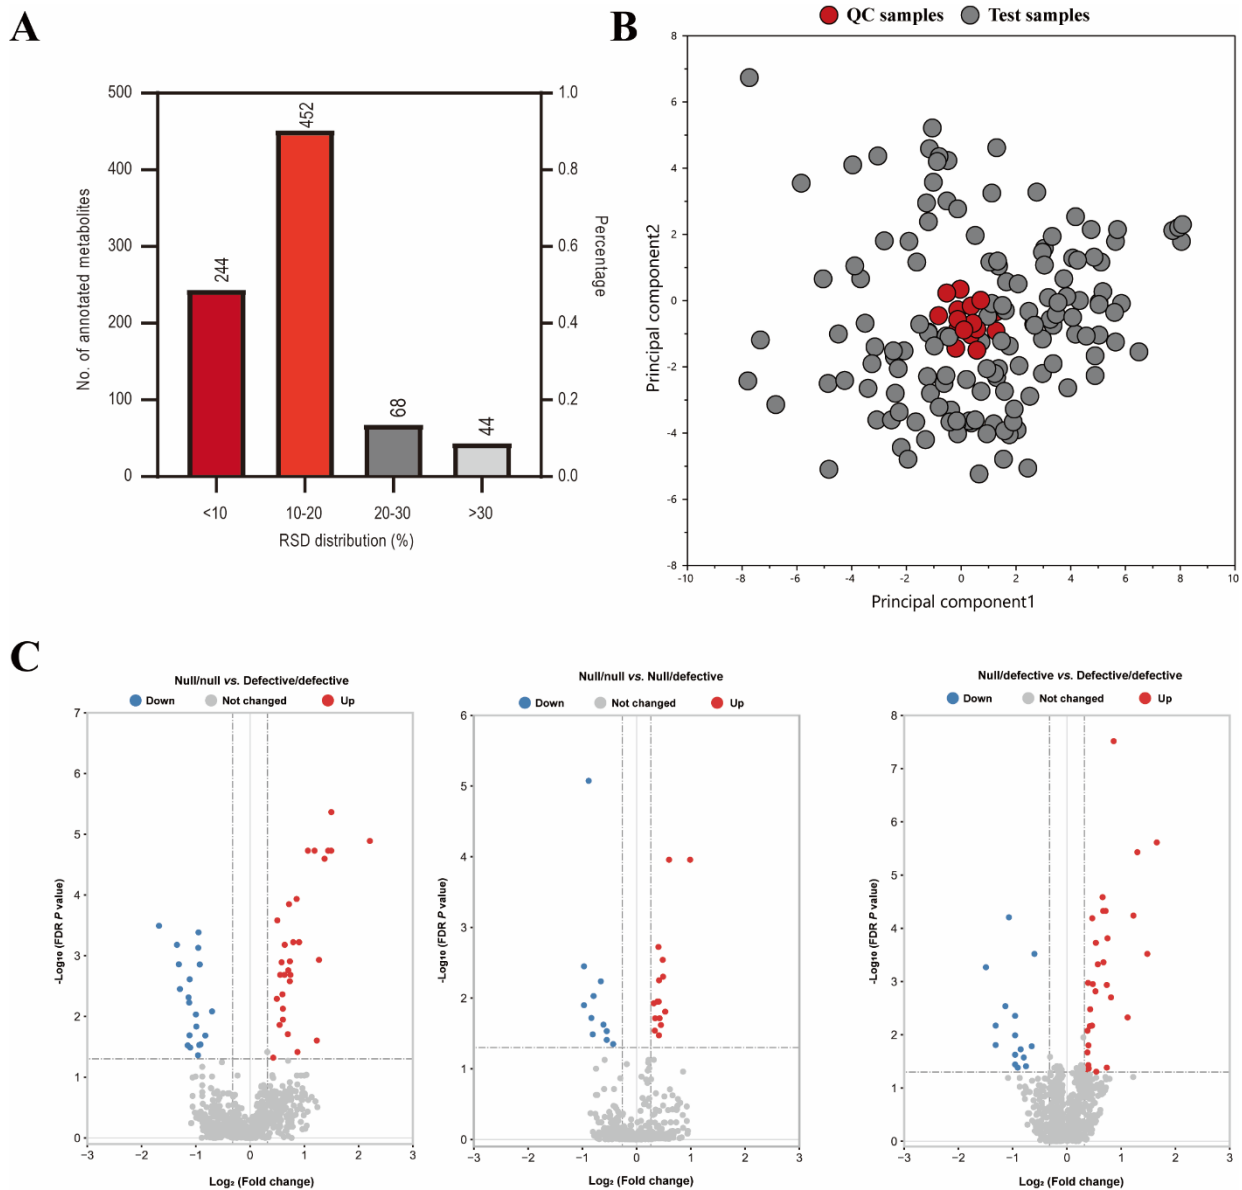

**Figure S1. Pattern analysis of metabolomic data, Related to Figures 1 and 2.** (A) Stability of analytical methods based on QC samples. (B) PCA scores plot of test samples and QC samples; each point represents an individual serum sample. (C) Volcano plots of each metabolite variation in pairwise comparisons of defective/defective, null/defective, and null/null groups; the dashed lines indicate the threshold for the significant differences.

**Table S2 Differentiated metabolites in the serum samples from null/null, null/defective, and defective/defective groups, Related to Figure 2**

| Metabolites          | NN versus DD |          |          | NN versus ND |          |          | ND versus DD |            |            |
|----------------------|--------------|----------|----------|--------------|----------|----------|--------------|------------|------------|
|                      | FC           | P value  | FDR      | FC           | P value  | FDR      | FC           | P value    | FDR        |
| 3-Indoxyl sulfate    | 0.57204      | 0.003088 | 0.005318 | 0.79261      | 0.43988  | 0.54545  | 0.72171      | 0.0079176  | 0.015835   |
| Betaine              | 1.7344       | 1.01E-05 | 4.82E-05 | 1.17         | 0.21726  | 0.33676  | 1.4825       | 0.00002034 | 9.0076E-05 |
| CE 16:0              | 1.5521       | 6.17E-05 | 0.000174 | 1.1538       | 0.042734 | 0.10598  | 1.3452       | 0.00048258 | 0.00136    |
| CE 16:1              | 1.4575       | 0.000537 | 0.001189 | 1.2458       | 0.025289 | 0.074664 | 1.17         | 0.078903   | 0.10871    |
| CE 18:0              | 1.7766       | 9.48E-08 | 1.04E-06 | 1.3267       | 0.00181  | 0.011224 | 1.3391       | 0.0014104  | 0.0034977  |
| CE 18:1              | 1.5562       | 1.29E-05 | 5.70E-05 | 1.119        | 0.18216  | 0.2972   | 1.3907       | 9.8485E-05 | 0.00035918 |
| Cholesterol          | 1.4959       | 3.00E-05 | 0.000109 | 1.2676       | 0.005293 | 0.019302 | 1.1801       | 0.025034   | 0.044315   |
| Cholic acid          | 1.8719       | 9.64E-06 | 4.82E-05 | 1.4414       | 0.003511 | 0.015547 | 1.2986       | 0.0062322  | 0.01288    |
| Docosahexaenoic acid | 0.61157      | 1.97E-05 | 8.15E-05 | 0.58399      | 1.32E-07 | 8.17E-06 | 1.0472       | 0.22852    | 0.28337    |
| Glutamine            | 0.62561      | 3.44E-05 | 0.000118 | 0.77265      | 0.000672 | 0.005607 | 0.8097       | 0.034576   | 0.054302   |
| Glycocholic acid     | 1.6322       | 8.44E-08 | 1.04E-06 | 1.246        | 0.002292 | 0.011844 | 1.3099       | 8.8228E-05 | 0.00034188 |
| Histidine            | 0.75347      | 0.000348 | 0.000829 | 0.93304      | 0.39385  | 0.51955  | 0.80754      | 2.6381E-05 | 0.00010904 |
| Hypoxanthine         | 2.1149       | 1.00E-07 | 1.04E-06 | 1.1647       | 0.02663  | 0.075049 | 1.8158       | 3.9567E-11 | 2.4531E-09 |
| Linoleic acid        | 1.6283       | 4.51E-05 | 0.000147 | 1.3305       | 0.010837 | 0.033594 | 1.2238       | 0.017106   | 0.032138   |
| Lysine               | 0.67142      | 0.000883 | 0.001824 | 1.0994       | 0.19914  | 0.31659  | 0.61071      | 4.5524E-08 | 1.4113E-06 |
| LysoPC 16:0          | 1.4682       | 5.90E-05 | 0.000174 | 1.1297       | 0.066401 | 0.14196  | 1.2996       | 0.0017557  | 0.0041866  |

|                     |         |          |          |         |          |          |         |            |            |
|---------------------|---------|----------|----------|---------|----------|----------|---------|------------|------------|
| LysoPC 18:0         | 1.4069  | 0.000166 | 0.00043  | 1.3036  | 0.001691 | 0.011224 | 1.0793  | 0.3508     | 0.3945     |
| LysoPC 18:1         | 1.8666  | 1.01E-05 | 4.82E-05 | 1.1707  | 0.1486   | 0.26324  | 1.5945  | 1.8052E-05 | 8.6096E-05 |
| LysoPC 18:2         | 1.6738  | 6.17E-05 | 0.000174 | 1.365   | 0.006968 | 0.023999 | 1.2262  | 0.029474   | 0.049389   |
| LysoPC O-18:1       | 1.8115  | 1.21E-06 | 9.35E-06 | 1.0796  | 0.13501  | 0.25861  | 1.6779  | 2.1982E-06 | 1.5143E-05 |
| LysoPC O-18:2       | 2.2009  | 1.28E-09 | 7.95E-08 | 1.3964  | 0.000232 | 0.002876 | 1.5761  | 1.0128E-07 | 2.0931E-06 |
| LysoPC 16:1         | 1.5114  | 0.000135 | 0.000363 | 1.1492  | 0.079181 | 0.15836  | 1.3151  | 0.004059   | 0.0089879  |
| LysoPA 16:0         | 2.3742  | 0.006364 | 0.009864 | 0.85052 | 0.55396  | 0.64803  | 2.7915  | 8.4868E-06 | 4.6073E-05 |
| LysoPE O-18:2       | 1.5205  | 0.000424 | 0.000974 | 0.95763 | 0.77881  | 0.8265   | 1.5878  | 3.1031E-07 | 4.5543E-06 |
| LysoPI 18:0         | 2.0543  | 0.006997 | 0.01058  | 0.87929 | 0.17889  | 0.2972   | 2.3364  | 5.7296E-07 | 5.9206E-06 |
| LysoPI 18:1         | 1.5204  | 0.000252 | 0.000624 | 1.0515  | 0.27422  | 0.39386  | 1.446   | 3.8871E-06 | 0.0000241  |
| Methionine          | 0.68545 | 0.002187 | 0.003988 | 0.81222 | 0.059313 | 0.1362   | 0.84391 | 0.077108   | 0.10871    |
| Palmitic acid       | 1.6187  | 0.000788 | 0.001685 | 1.1752  | 0.1458   | 0.26324  | 1.3774  | 0.00131    | 0.0033841  |
| Palmitoyl-carnitine | 1.3437  | 0.002602 | 0.004609 | 1.2617  | 0.008841 | 0.02885  | 1.065   | 0.070257   | 0.10371    |
| Phenylalanine       | 2.1981  | 9.48E-08 | 1.04E-06 | 1.342   | 0.004974 | 0.019273 | 1.6379  | 3.6728E-07 | 4.5543E-06 |
| Purine              | 1.4156  | 3.40E-06 | 2.11E-05 | 1.3223  | 0.000122 | 0.001892 | 1.0706  | 0.1304     | 0.17202    |
| Retinoic acid       | 2.0188  | 1.59E-07 | 1.41E-06 | 1.4026  | 0.000481 | 0.004975 | 1.4393  | 0.00015852 | 0.00051727 |
| Serine              | 1.8317  | 0.0019   | 0.003569 | 1.1018  | 0.78651  | 0.8265   | 1.6624  | 0.00010986 | 0.00037841 |
| Sphingosine         | 1.246   | 0.0019   | 0.003569 | 1.1604  | 0.030255 | 0.081557 | 1.0738  | 0.020451   | 0.037293   |
| Stearoyl-carnitine  | 1.6434  | 1.65E-06 | 1.14E-05 | 1.3326  | 0.000724 | 0.005607 | 1.2332  | 0.0026898  | 0.0061765  |

|                  |         |          |          |        |          |          |         |            |            |
|------------------|---------|----------|----------|--------|----------|----------|---------|------------|------------|
| TAG 52:2         | 1.6238  | 0.003194 | 0.005353 | 1.3986 | 0.052865 | 0.12606  | 1.161   | 0.10098    | 0.1361     |
| TAG 52:3         | 1.328   | 0.00722  | 0.010658 | 1.5142 | 5.52E-06 | 0.000151 | 0.87702 | 0.4175     | 0.4463     |
| TAG 54:2         | 4.6173  | 3.94E-08 | 1.04E-06 | 1.9819 | 7.33E-06 | 0.000151 | 2.3297  | 0.025731   | 0.044315   |
| TAG 54:3         | 1.6628  | 2.73E-05 | 0.000106 | 1.204  | 0.063486 | 0.14058  | 1.3811  | 8.4066E-07 | 6.5151E-06 |
| Taurine          | 0.69793 | 0.003535 | 0.005767 | 1.0578 | 0.43988  | 0.54545  | 0.65982 | 8.9173E-06 | 4.6073E-05 |
| Taurocholic acid | 2.3442  | 0.001099 | 0.002199 | 1.3355 | 0.28312  | 0.39386  | 1.7553  | 0.00022658 | 0.00070238 |

Two-tailed Student's *t* test or Mann Whitney *U* test were used for each comparison. NN = null/null, ND = null/defective, DD = defective/defective, FC = fold changes, FDR = false discovery rate P value, CE = cholesterol esters, TAG = triacylglycerides, LPI = lysophosphatidylinositol, LysoPC = lysophosphocholines, LysoPC O = alkyl LysoPC, LysoPE = lysophosphoethanolamines, LysoPE O = alkyl LysoPE, LysoPA = lysophosphatidic acid.
